# Supplementary material
Source: MDPI journal article supplement (https://www.mdpi.com/2306-5338/11/2/23)
Supplement: s1 [file s1]

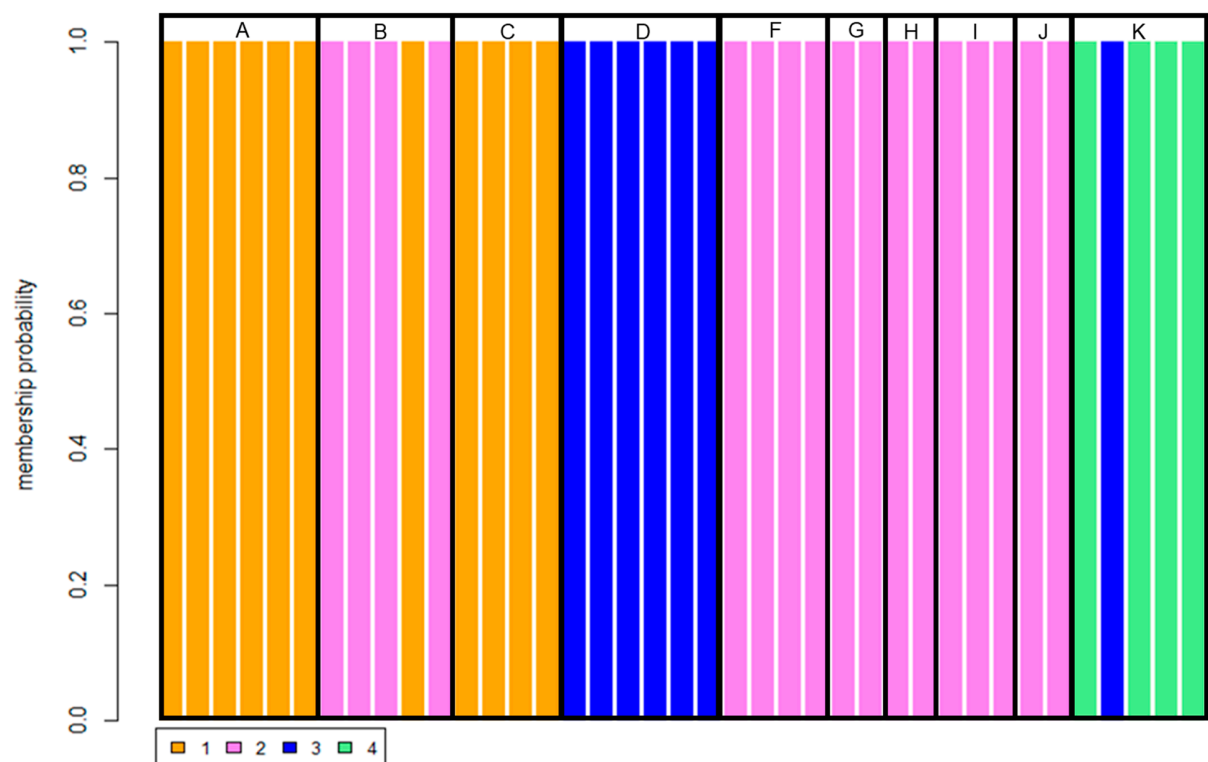

Supplemental Figure 1. Discriminant analysis of principal components (DAPC) membership probabilities for the best supported number of clusters ( $K=4$ ). Group colors and numbers are the same as shown in Figure 6 and 7.
